# Supplementary material
Source: Elsevier journal article supplement (https://rcastoragev2.blob.core.windows.net/e8d76fe3b6c1e6f20e1cf10474012b34/mmc1.pdf)
Supplement: mmc1 [file mmc1.pdf]

**Developmental Cell, Volume 57**

## **Supplemental information**

### **The spatiotemporal dynamics of microglia across the human lifespan**

**David A. Menassa, Tim A.O. Muntslag, Maria Martin-Estebané, Liam Barry-Carroll, Mark A. Chapman, Istvan Adorjan, Teadora Tyler, Bethany Turnbull, Matthew J.J. Rose-Zerilli, James A.R. Nicoll, Zeljka Krsnik, Ivica Kostovic, and Diego Gomez-Nicola**

## SUPPLEMENTAL ITEMS

### Index:

Figures S1 to S6

Tables S1, S2 and S4

## SUPPLEMENTAL FIGURES

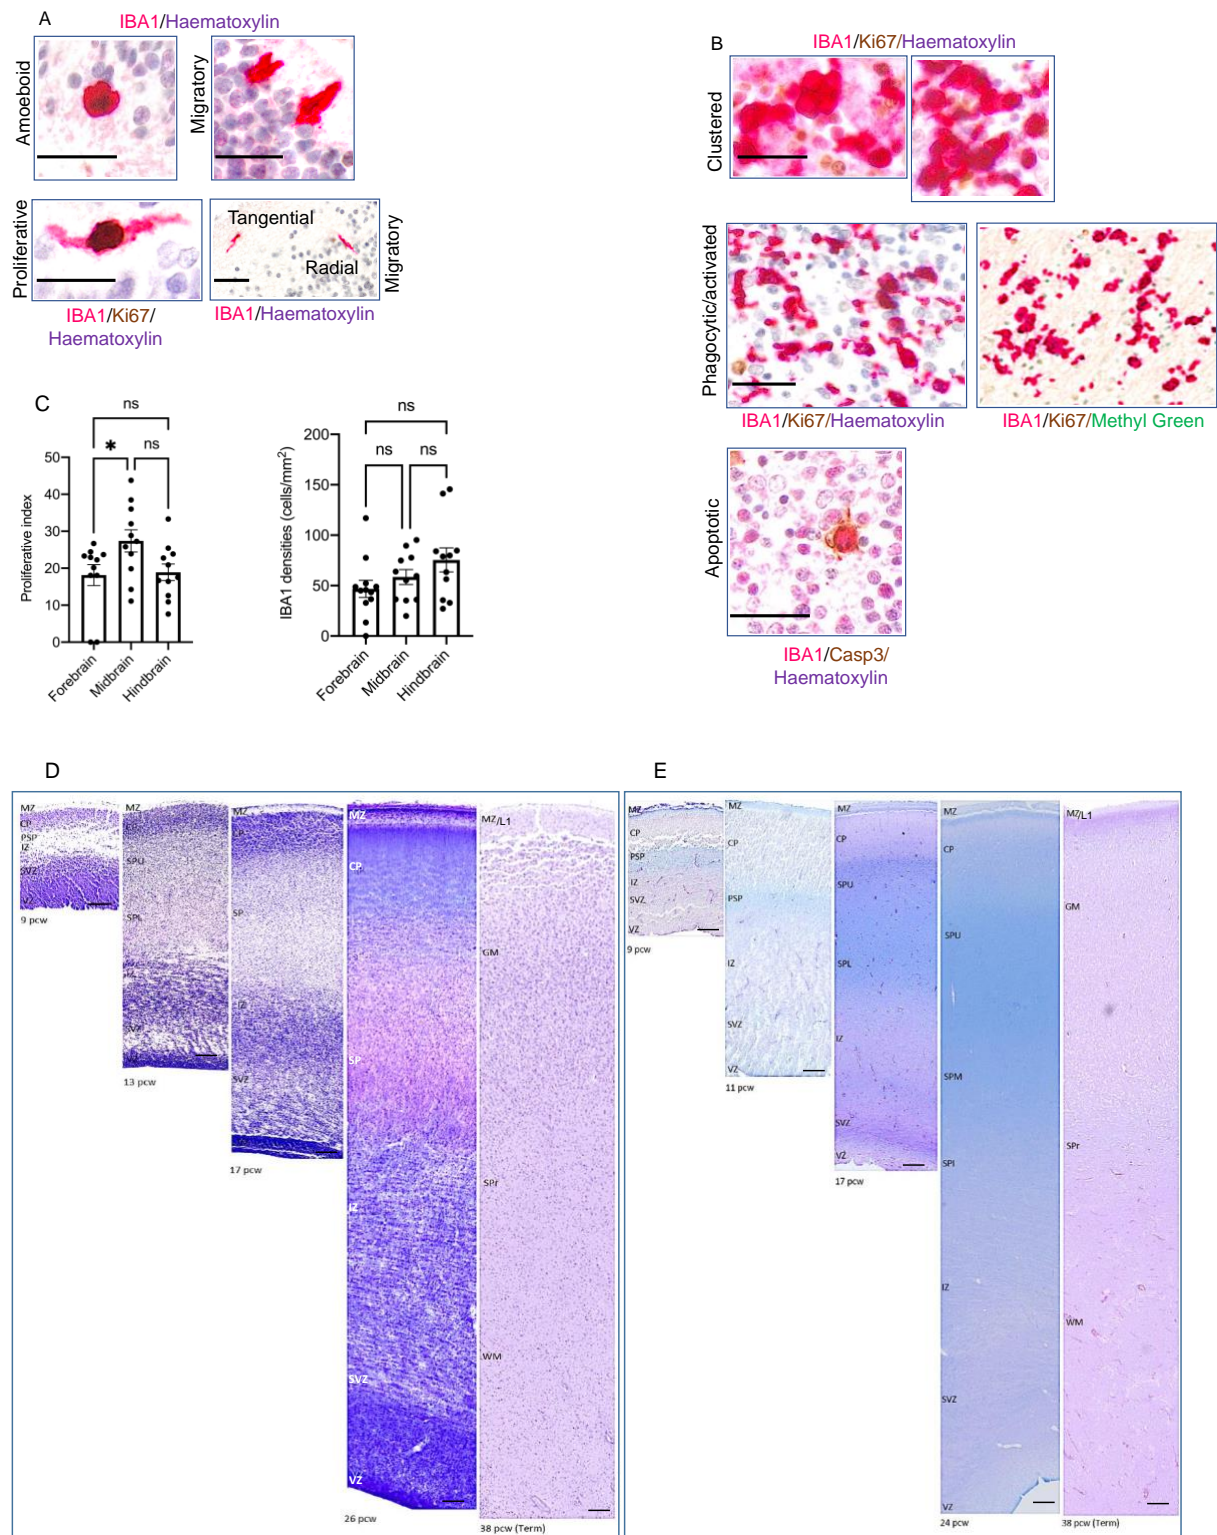

**Figure S1, Related to figures 2, 3 & 4.** (A, B) Microglia morphologies during development. (A) Microglial morphologies are amoeboid, proliferative, or migratory in the embryonic age (3-8 pcw) and (B), additional morphologies throughout fetal life (9-38 pcw) are seen such as clustered, phagocytic, and apoptotic. Scale bar: 50  $\mu$ m. (C) Embryonic regional brain

proliferation and densities. Proliferative indices and IBA1<sup>+</sup> densities between brain regions (n=14). \* $p < 0.01$ , ns  $p > 0.05$ . All data are shown as mean  $\pm$  SEM. (D, E) Delineation of anatomical boundaries in the developing cortex between 9 and 38 postconceptional weeks. (D) Nissl histochemistry of transient cortical zones. (E) Periodic-Acid Schiff/Alcian Blue histochemistry for marking the subplate in transient cortical zones. CP: cortical plate; GM: Grey matter; IZ: intermediate zone; MZ: marginal zone; PSP: presubplate; pcw: postconceptional week; SP: subplate; SPU: subplate upper portion; SPM: subplate middle portion; SPI: subplate inferior portion; SPL: subplate lower portion; SP<sub>r</sub>: subplate remnant; SVZ: subventricular zone; VZ: ventricular zone; WM: white matter. Scale bar: 100 $\mu$ m.

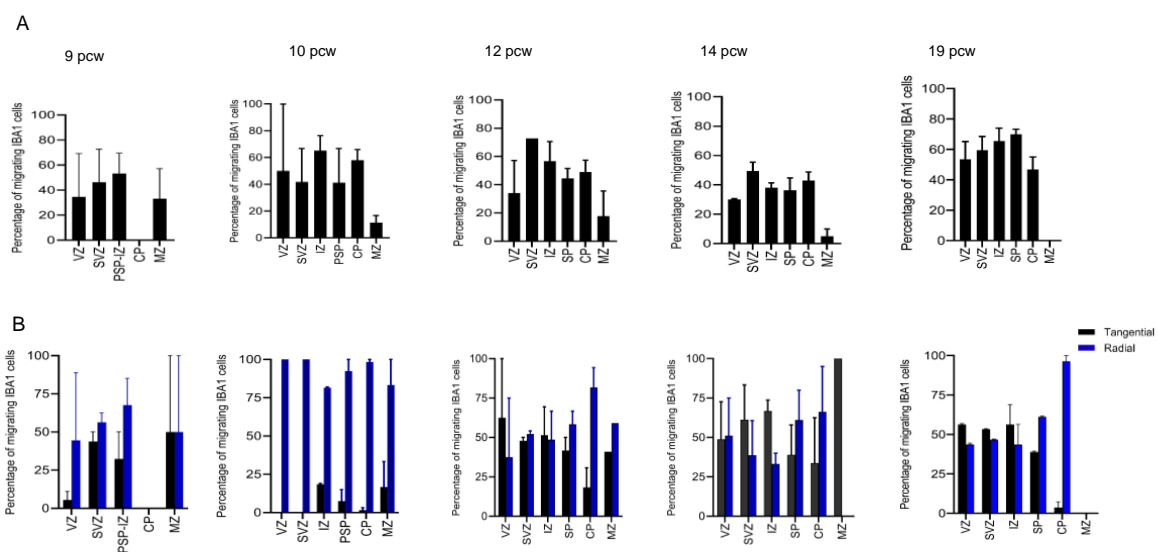

**Figure S2. Migratory microglial profile and phenotype during development, *Related to figures 2 & 3.***

(A) Percentage of IBA1 cells migrating into the various transient zones (n=2 for each timepoint). At 9 pcw, the CP has no migrating microglia whilst most layers have substantial numbers of migrating cells. From 10-14 pcw, migrating cells are found in all layers and by 19 pcw, migrating cells can no longer be seen present in the MZ. (B) Type of migration in each transient layer (n=2 for each timepoint). Migration is radial and/or tangential depending on each layer across 9-19 pcw. CP: cortical plate; IZ: intermediate zone; MZ: marginal zone; PSP: presubplate; pcw: postconceptional week; SP: subplate; SVZ: subventricular zone; VZ: ventricular zone.

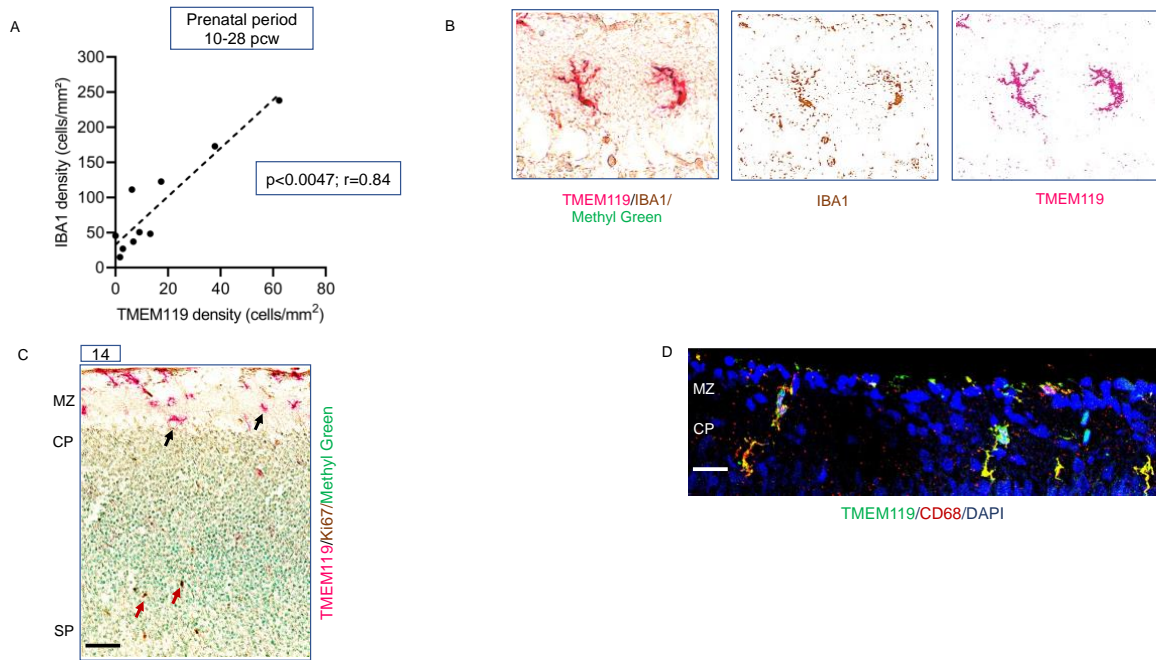

**Figure S3. TMEM119 expression during prenatal development, *Related to figure 3.*** (A) IBA1 densities correlate positively with TMEM119 densities (n=10 cases between 10-28 pcw) ( $r=0.84$ ,  $p<0.0047$ ). (B) Deconvolution of signal showing that TMEM119 and IBA1 colocalise. (C) TMEM119<sup>+</sup> cells are not proliferative in the MZ (black arrows) in a representative 14 pcw neocortical column. Proliferation (non-microglial) is shown in the deeper layers (red arrows for the Ki67 signal). Scale bar: 100  $\mu$ m. (D) TMEM119<sup>+</sup> cells co-express CD68 lysosomal marker in the MZ. Scale bar: 50  $\mu$ m. CP: cortical plate; MZ: marginal zone; SP: subplate.



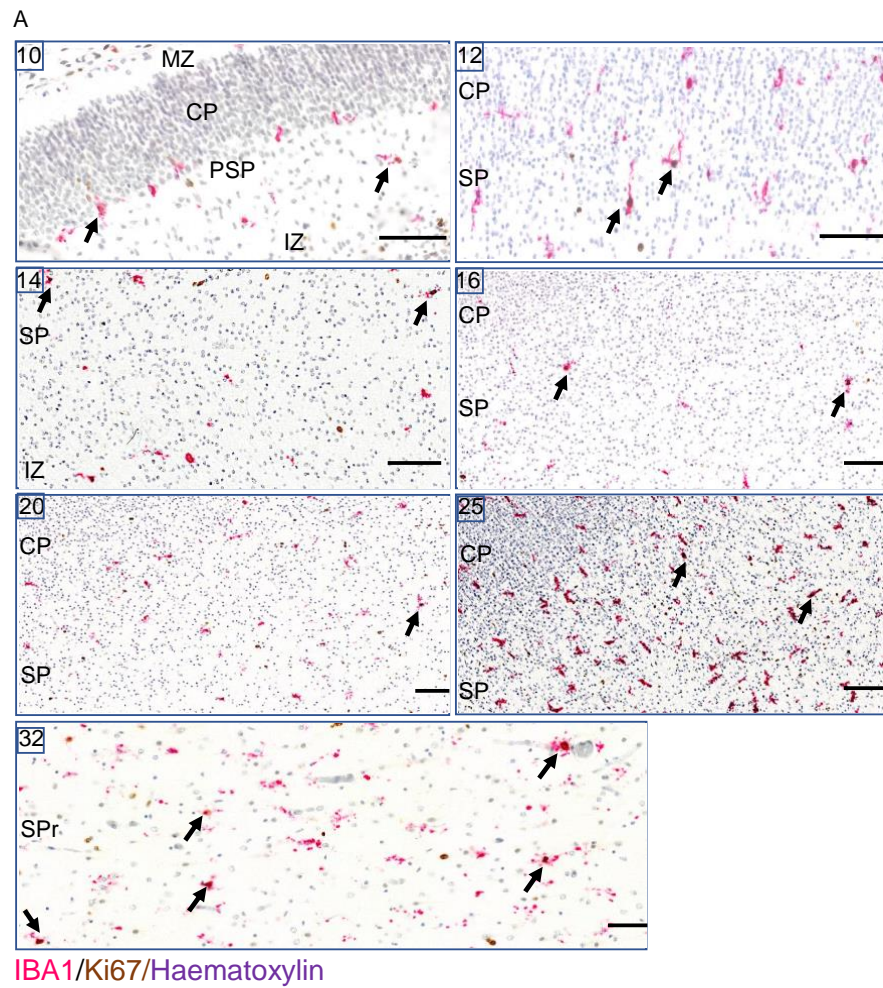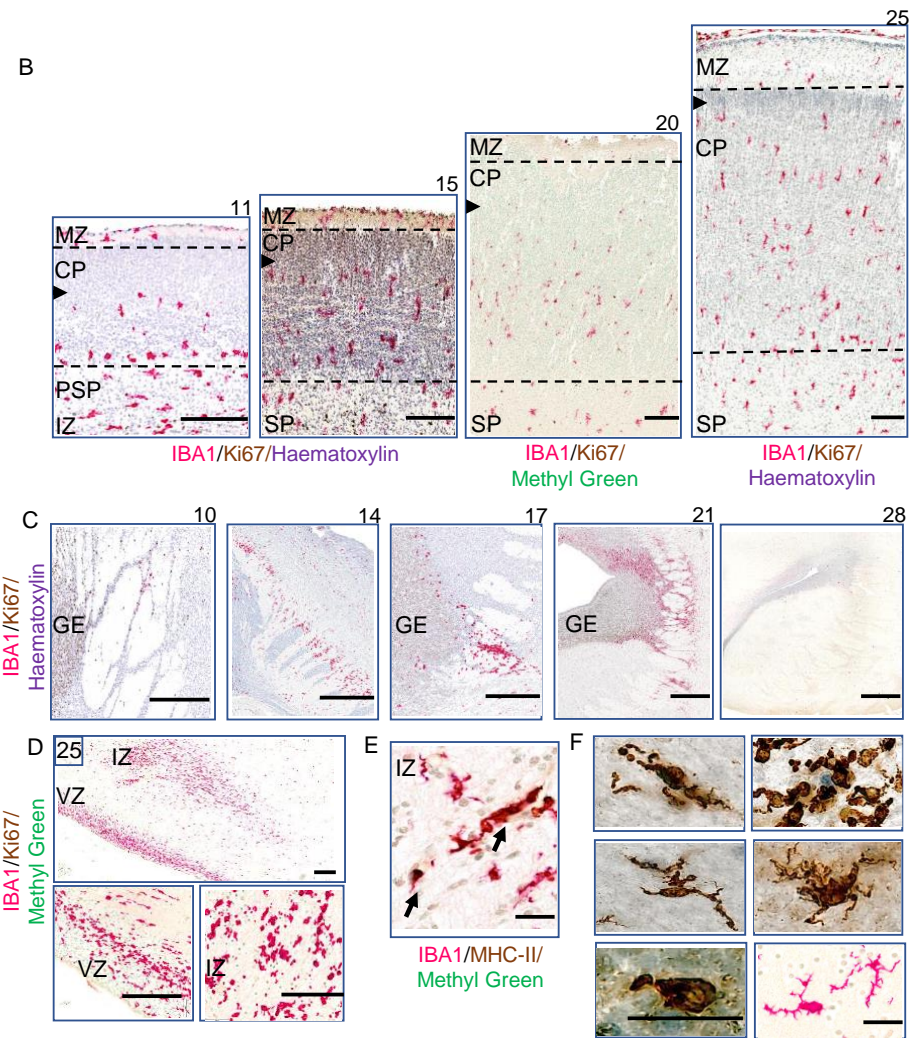

**Figure S4. Descriptive account of regional findings across development, *Related to figures 2, 3 & 4.***

(A) Proliferation of microglial cells is highest in the subplate region across gestation. Scale bar: 100  $\mu\text{m}$  (B) Microglial cells invade the upper portion of the cortical plate by 25 pcw and spare it before that time. Scale bar: 100  $\mu\text{m}$  (C) Ventral telencephalon microglia cluster around the internal and external capsules. These clusters increase during gestation and disappear by 28 pcw. Scale bar: 500  $\mu\text{m}$  (D) Microglial hotspots can be seen in the intermediate zone during most of gestation and resolve by the 32<sup>nd</sup> pcw. Scale bar: 100  $\mu\text{m}$  (E) Microglia are positive for MHCII. Scale bar: 75  $\mu\text{m}$  (E) and towards the late third trimester, cluster in the ventricular zone. (F) Range of microglial morphologies from amoeboid to intermediate and ramified mature types can be seen in transient layers developmentally. Scale bar: 75  $\mu\text{m}$ . *CP* : cortical plate; *GE*: ganglionic eminence; *IZ* : intermediate zone ; *MZ* : marginal zone ; *PSP* : presubplate; *pcw*: postconceptional week; *SP*: subplate;; *SVZ*: subventricular zone; *VZ*: ventricular zone.

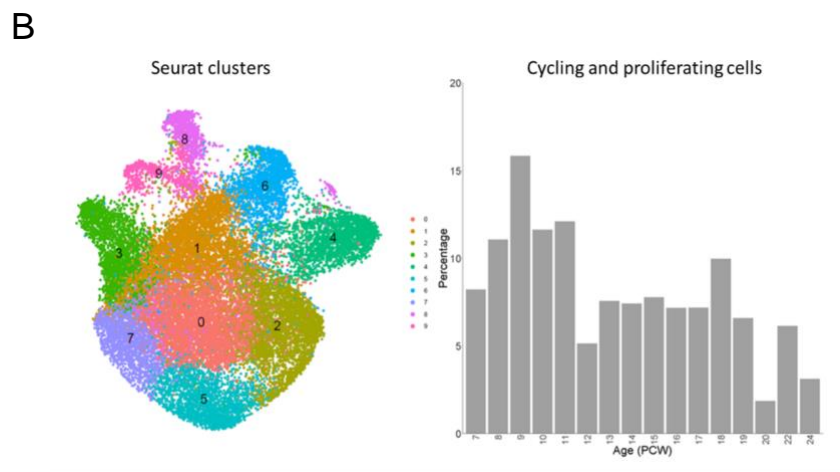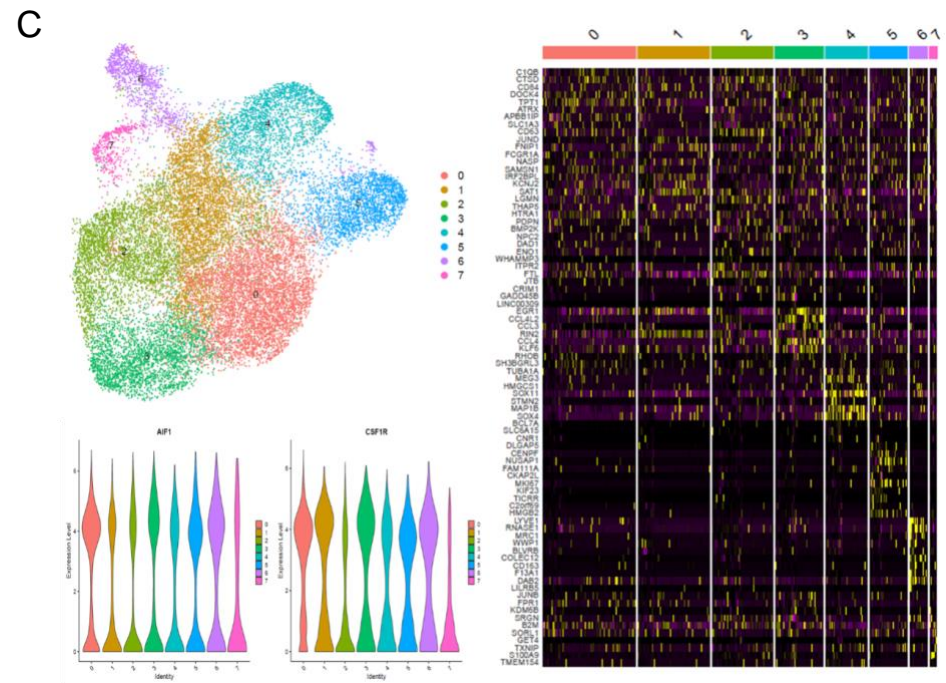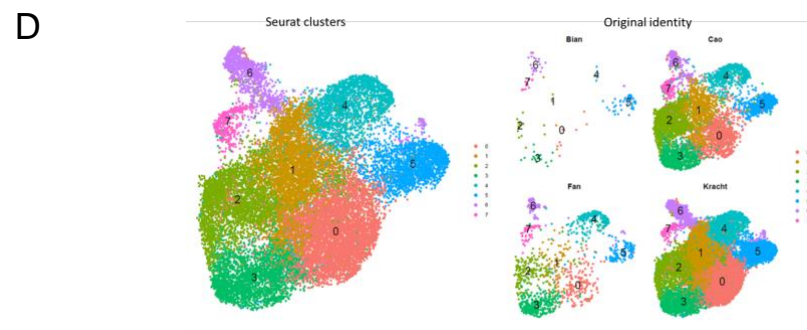



**Figure S5. Single-cell RNA-seq analysis, *Related to figure 5.*** (A) Preliminary analysis identified a cluster enriched for erythrocyte (ERY) markers (e.g. HBG2, HBB). The single-nuclei dataset by (Cao et al. 2020) contributed most cells of this ERY cluster, suggesting that this cluster is a technical, method-specific artefact, albeit all datasets showed some degree of ERY. We removed the ERY cluster and re-clustered prior to our analysis of cycling proliferating cells. (B) Seurat clusters before the removal of the ERY cluster (left). Cycling and proliferating cell pattern was not affected. (C) 8 transcriptionally distinct clusters were identified in our integrated object. The heatmap displays the top 5 DEG of each cluster, as identified with the FindAllMarkers function (MAST). Several developmental homeostatic microglia were identified as well as several previously identified microglial subtypes (CPM, CAM, BAM). Of note, one cluster displayed markers not commonly associated with microglia with NPC-linked genes. which may suggest impurities in preparation; or capture a novel microglial subtype that restricts the progenitor pool. (D) Spatial distribution of gestational myeloid cells by original identity. CS: Carnegie stage; GW/GA: gestational week/age; PCD: postconceptional day; PCW: postconceptional week.

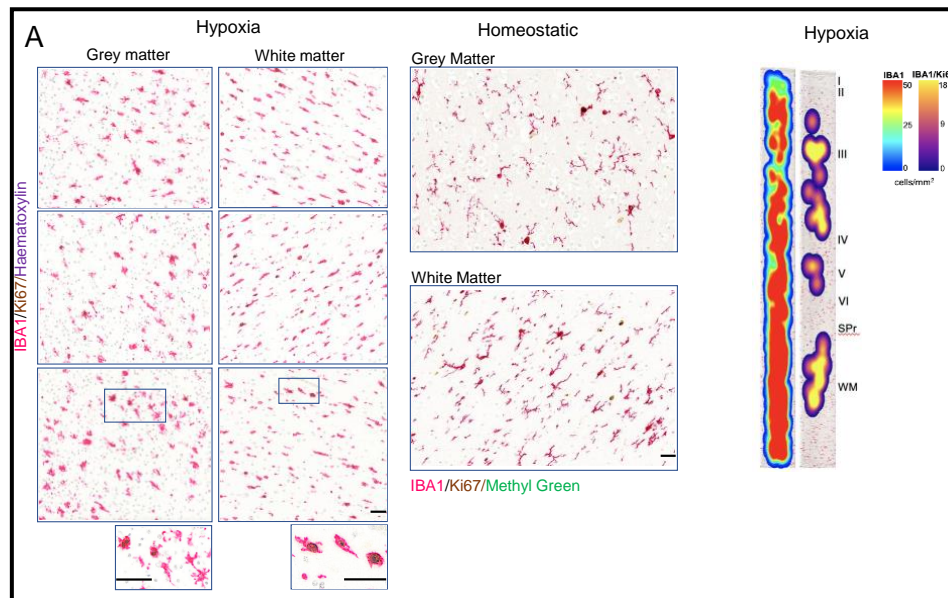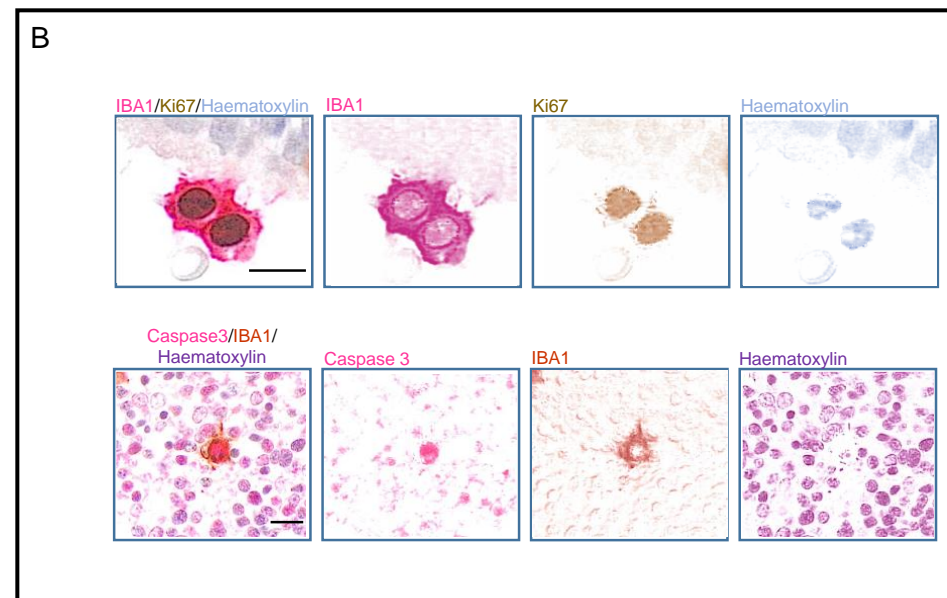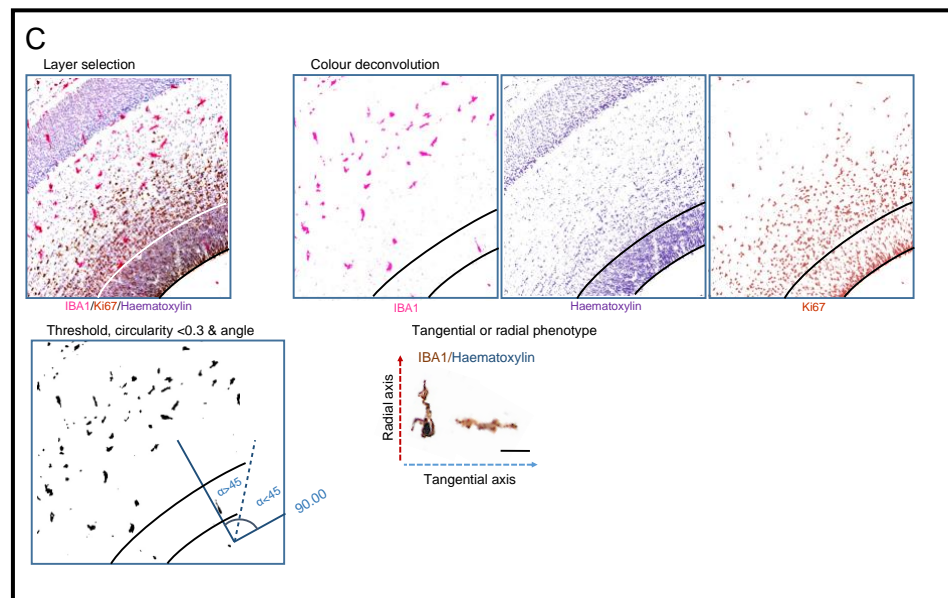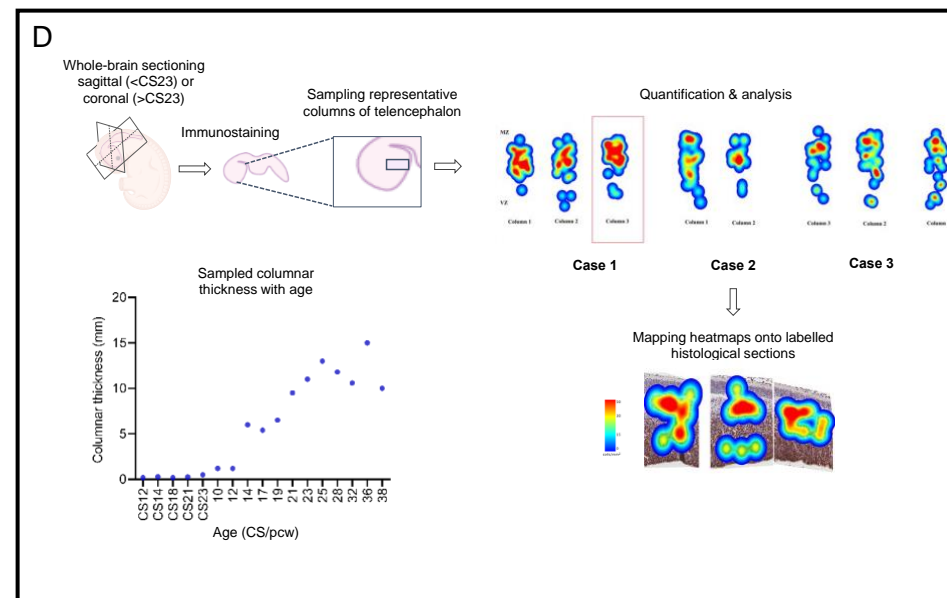

**Figure S6. Tissue quality control and analysis, Related to Methods and Figures 1 & 4.** (A) Reaction of microglia to hypoxia. Representative photomicrographs of microglia reactive to hypoxic-ischaemic injury in a 38 postconceptional term grey and white matters (Fetus 52 in table 7) and homeostatic microglial ramified morphology with a lower proliferation rate in the absence of hypoxic injury in a 38 postconceptional week case included in our study. Note the amoeboid shape and higher proliferation rate compared to homeostatic microglia. Representative heatmap of proliferation and density along the cortical column. *SPr*: subplate remnant; *WM*: white matter. Scale bar: 50µm. (B) Deconvolution of signal in brightfield. Example of colour deconvolution in brightfield for proliferative microglia (IBA1/Ki67/Haematoxylin). Example of colour deconvolution in brightfield for cell death (Caspase 3/IBA1/Haematoxylin). Scale bar: 10µm. (C) Migration analysis workflow: Layer selection, Deconvolution and Thresholded photomicrograph with particle selection according to a circularity criterion  $<0.3$  for a migratory cell phenotype. The angle is recorded between the major axis of the cell and the layer plane with  $\alpha < 45$  for tangential and  $\alpha > 45$  for radial migrations. Tangential and radial microglial phenotypes. Scale bar: 30µm. Figure S12. Heatmap analysis, Related to figure 4 & methods. (D) Workflow of image processing to obtain heatmaps from cortical columns. Columnar thickness measurements for heatmaps against age. CS: Carnegie stages.

**Table S1. Data source characteristics, Related to figure 5 & methods.**

|           | Source                    |                          |                          |                             |              |
|-----------|---------------------------|--------------------------|--------------------------|-----------------------------|--------------|
| Age (pcw) | <i>Bian et al. (2020)</i> | <i>Cao et al. (2020)</i> | <i>Fan et al. (2020)</i> | <i>Kracht et al. (2020)</i> | # (of cells) |
| 3         | 9                         |                          |                          |                             | 9            |
| 4         | 32                        |                          |                          |                             | 32           |
| 5         | 24                        |                          | 1                        |                             | 25           |
| 6         | 7                         |                          | 28                       |                             | 35           |
| 7         |                           |                          | 17                       | 2872                        | 2889         |
| 8         | 63                        |                          | 28                       | 1926                        | 2017         |
| 9         |                           |                          | 11                       | 2467                        | 2478         |
| 10        |                           |                          | 73                       | 1806                        | 1879         |
| 11        |                           |                          | 31                       | 767                         | 798          |
| 12        |                           |                          | 66                       |                             | 66           |
| 13        |                           | 1726                     |                          | 2175                        | 3901         |
| 14        |                           |                          | 64                       | 876                         | 940          |
| 15        |                           |                          | 303                      | 842                         | 1145         |
| 16        |                           | 3032                     |                          | 842                         | 3874         |
| 17        |                           | 458                      |                          |                             | 458          |
| 18        |                           | 856                      | 122                      |                             | 978          |
| 19        |                           |                          | 149                      |                             | 149          |
| 20        |                           |                          | 40                       |                             | 40           |
| 21        |                           |                          |                          |                             |              |
| 22        |                           |                          | 193                      |                             | 193          |
| 23        |                           |                          |                          |                             |              |
| 24        |                           |                          | 232                      |                             | 232          |

\*pcw: postconceptional weeks

?

| <b>Table S2. Developmental demographics, <i>Related to figure 1, 2, 3, 4 &amp; methods.</i></b> |                |                      |            |                |               |                          |                  |
|-------------------------------------------------------------------------------------------------|----------------|----------------------|------------|----------------|---------------|--------------------------|------------------|
| <b>Case</b>                                                                                     | <b>GA (CS)</b> | <b>PCW</b>           | <b>Sex</b> | <b>PMI (h)</b> | <b>BW (g)</b> | <b>Cause of Death</b>    | <b>Histology</b> |
| Embryo                                                                                          | 5 (10)         | Late 3 <sup>rd</sup> | F          | 3.67           | n/a           | Elective termination     | Normal           |
| Embryo                                                                                          | 6 (12)         | 4                    | M          | 3              | n/a           | Elective termination     | Normal           |
| Embryo                                                                                          | 6 (12)         | 4                    | F          | 3.92           | n/a           | Elective termination     | Normal           |
| Embryo                                                                                          | 6 (12)         | 4                    | F          | 4.67           | n/a           | Elective termination     | Normal           |
| Embryo                                                                                          | 7 (14)         | 5                    | M          | 7              | n/a           | Elective termination     | Normal           |
| Embryo                                                                                          | 7 (14)         | 5                    | F          | 6.42           | n/a           | Elective termination     | Normal           |
| Embryo                                                                                          | 7 (14)         | 5                    | M          | n/k            | n/a           | Elective termination     | Normal           |
| Embryo                                                                                          | 8 (16)         | 6                    | M          | 2.75           | n/a           | Elective termination     | Normal           |
| Embryo                                                                                          | 8 (16)         | 6                    | F          | 2.5            | n/a           | Elective termination     | Normal           |
| Embryo                                                                                          | 9 (18)         | 7                    | M          | 5.25           | n/a           | Elective termination     | Normal           |
| Embryo                                                                                          | 9 (18)         | 7                    | F          | n/k            | n/a           | Elective termination     | Normal           |
| Embryo                                                                                          | 10 (21)        | 8                    | M          | 1.25           | n/a           | Elective termination     | Normal           |
| Embryo                                                                                          | 10 (21)        | 8                    | F          | n/k            | n/a           | Elective termination     | Normal           |
| Embryo                                                                                          | 11 (23)        | 9                    | M          | n/k            | n/k           | Elective termination     | Normal           |
| Embryo                                                                                          | 11 (23)        | 9                    | F          | 16.67          | n/k           | Elective termination     | Normal           |
| Fetus                                                                                           | 12             | 10                   | F          | 16.67          | n/k           | Elective termination     | Normal           |
| Fetus                                                                                           | 12             | 10                   | M          | 16.67          | n/k           | Elective termination     | Normal           |
| Fetus                                                                                           | 12             | 10                   | n/k        | 3.33           | n/k           | Elective termination     | Normal           |
| Fetus                                                                                           | 13             | 11                   | M          | 2              | n/k           | Termination of pregnancy | Normal           |
| Fetus                                                                                           | 13             | 11                   | M          | n/k            | n/k           | Elective termination     | Normal           |
| Fetus                                                                                           | 14             | 12                   | F          | 2.5            | n/k           | Elective termination     | Normal           |
| Fetus                                                                                           | 14             | 12                   | F          | 120            | 10            | Elective termination     | Normal           |
| Fetus                                                                                           | 14             | 12                   | F          | 16.67          | n/k           | Elective termination     | Normal           |
| Fetus                                                                                           | 15             | 13                   | M          | n/k            | n/k           | Termination of pregnancy | Normal           |
| Fetus                                                                                           | 16             | 14                   | F          | 16.00          | n/k           | Elective termination     | Normal           |
| Fetus                                                                                           | 16             | 14                   | M          | n/k            | n/k           | Termination of pregnancy | Normal           |
| Fetus                                                                                           | 17             | 15                   | M          | n/k            | n/k           | Termination of pregnancy | Normal           |



|         |    |    |   |       |     |                                              |                          |
|---------|----|----|---|-------|-----|----------------------------------------------|--------------------------|
| Fetus   | 17 | 15 | F | n/k   | n/k | Elective termination                         | Normal                   |
| Fetus   | 18 | 16 | M | n/k   | 33  | Elective termination                         | Normal                   |
| Fetus   | 18 | 16 | M | 16.67 | n/k | Elective termination                         | Normal                   |
| Fetus   | 19 | 17 | F | 144   | 41  | Elective termination                         | Normal                   |
| Fetus   | 19 | 17 | M | n/k   | n/k | Miscarriage                                  | Normal                   |
| Fetus   | 20 | 18 | M | 16.67 | n/k | Elective termination                         |                          |
| Fetus   | 21 | 19 | M | 48    | 65  | Termination of pregnancy                     | Normal                   |
| Fetus   | 21 | 19 | M | 24    | 67  | Miscarriage                                  | Normal                   |
| Fetus   | 22 | 20 | M | 72    | 93  | Miscarriage                                  | Normal                   |
| Fetus   | 23 | 21 | F | n/k   | n/k | Termination of pregnancy                     | Normal                   |
| Fetus   | 25 | 23 | M | 48    | 121 | Termination of pregnancy                     | Normal                   |
| Fetus   | 25 | 23 | M | n/k   | 110 | Intrauterine death                           | Normal                   |
| Fetus   | 26 | 24 | F | n/k   | 125 | Preterm birth                                | Normal                   |
| Fetus   | 27 | 25 | F | 6     | n/k | Intrauterine death                           | Normal                   |
| Fetus   | 27 | 25 | F | n/k   | n/k | Preterm birth, defective placenta            | Normal                   |
| Fetus   | 28 | 26 | M | 96    | 159 | n/k                                          | Normal                   |
| Fetus   | 28 | 26 | M | n/k   | n/k | n/k                                          | Normal                   |
| Fetus   | 30 | 28 | F | 240   | n/k | Maternal road accident/placental separation  | Normal frontal histology |
| Fetus   | 34 | 32 | M | 144   | 312 | Respiratory distress syndrome                | Normal                   |
| Fetus   | 35 | 33 | F | n/k   | 295 | Pulmonary hypoplasia, preterm birth          | Normal                   |
| Fetus   | 38 | 36 | F | 17    | 380 | Preterm birth                                | Normal                   |
| Fetus   | 40 | 38 | M | 5     | n/k | Perinatal asphyxia, cardiorespiratory arrest | Normal                   |
| Fetus   | 40 | 38 | F | 5     | n/k | Placental disruption, <i>in utero</i> death  | Normal                   |
| Fetus   | 40 | 38 | M | n/k   | 370 | Septicaemia, premature birth                 | Normal                   |
| Fetus † | 40 | 38 | M | 72    | 356 | Intrauterine death                           | Hypoxic injury           |

Total number of cases shown is  $n = 52$ . In total, 63 cases were assessed. † Only one hypoxic case is included in the table above for reference. Refer also to supplementary figure 1 for a representative example of excluded cases due to hypoxic injury to the area. *BW*: brain weight; *CS*: Carnegie stage; *F*: female; *GA*: gestational age; *M*: male; *n/a*: not applicable; *n/k*: not known; *PCW*: postconceptional week; *PMI*: post-mortem interval.

| <b>Table S4. Postnatal demographics, <i>Related to figure 1, 6 &amp; methods.</i></b> |                    |            |                |               |                        |                  |
|---------------------------------------------------------------------------------------|--------------------|------------|----------------|---------------|------------------------|------------------|
| <b>Case</b>                                                                           | <b>Age (years)</b> | <b>Sex</b> | <b>PMI (h)</b> | <b>BW (g)</b> | <b>Cause of Death</b>  | <b>Histology</b> |
| Neonate                                                                               | 0.003*             | F          | n/k            | 390           | Intrapartum asphyxia   | Normal           |
| Neonate                                                                               | 0.008*             | F          | n/k            | 400           | SUDI                   | Normal           |
| Neonate                                                                               | 0.01*              | M          | n/k            | 415           | Intrapartum asphyxia   | Normal           |
| Neonate                                                                               | 0.02*              | M          | n/k            | 375           | n/k                    | Normal           |
| Neonate                                                                               | 0.03*              | M          | n/k            | 350           | SUDI                   | Normal           |
| Neonate                                                                               | 0.03*              | F          | n/k            | 335           | SUDI                   | Normal           |
| Neonate                                                                               | 0.05*              | M          | n/k            | n/k           | Respiratory arrest     | Normal           |
| Neonate                                                                               | 0.07*              | F          | n/k            | 395           | Intrapartum asphyxia   | Normal           |
| Neonate                                                                               | 0.07*              | M          | n/k            | 465           | SUDI                   | Normal           |
| Neonate                                                                               | 0.08*              | F          | n/k            | 465           | SUDI                   | Normal           |
| Neonate                                                                               | 0.08*              | F          | n/k            | 525           | SUDI                   | Normal           |
| Infant                                                                                | 0.14*              | F          | n/k            | 535           | Pneumonia              | Normal           |
| Infant                                                                                | 0.17*              | M          | n/k            | 530           | SUDI                   | Normal           |
| Infant                                                                                | 0.17*              | M          | n/k            | 555           | SUDI                   | Normal           |
| Infant                                                                                | 0.25*              | M          | 72             | 598           | SUDI                   | Normal           |
| Infant                                                                                | 0.33*              | M          | n/k            | 840           | SUDI                   | Normal           |
| Infant                                                                                | 0.42*              | F          | n/k            | 485           | SUDI                   | Normal           |
| Infant                                                                                | 0.5*               | M          | n/k            | 885           | SUDI                   | Normal           |
| Infant                                                                                | 0.50*              | M          | n/k            | n/k           | n/k                    | Normal           |
| Infant                                                                                | 0.92*              | F          | 96             | 1008          | SUDEP                  | Normal           |
| Infant                                                                                | 0.92*              | M          | 96             | 1288          | Subdural haemorrhage   | Normal           |
| Child                                                                                 | 1                  | M          | 48             | 1342          | SUDEP                  | Normal           |
| Child                                                                                 | 1.5                | F          | n/k            | 1295          | Aspiration, SUDEP      | Normal           |
| Child                                                                                 | 2                  | M          | 96             | 1379          | SUDEP                  | Normal           |
| Adult                                                                                 | 18                 | M          | 5              | n/k           | Car crash              | Normal           |
| Adult                                                                                 | 25                 | M          | 53             | 1640          | Suspension by ligature | Normal           |
| Adult                                                                                 | 25                 | M          | 81             | 1500          | Road traffic collision | Normal           |

|                                                                                                                                                                                                                                                                                                                                                                                                                                                                           |    |   |     |      |                            |        |
|---------------------------------------------------------------------------------------------------------------------------------------------------------------------------------------------------------------------------------------------------------------------------------------------------------------------------------------------------------------------------------------------------------------------------------------------------------------------------|----|---|-----|------|----------------------------|--------|
| Adult                                                                                                                                                                                                                                                                                                                                                                                                                                                                     | 27 | M | 67  | 1540 | Ischaemic heart disease    | Normal |
| Adult                                                                                                                                                                                                                                                                                                                                                                                                                                                                     | 30 | M | 71  | 1670 | n/k                        | Normal |
| Adult                                                                                                                                                                                                                                                                                                                                                                                                                                                                     | 35 | F | 44  | 1240 | n/k                        | Normal |
| Adult                                                                                                                                                                                                                                                                                                                                                                                                                                                                     | 37 | F | 46  | 1290 | Hepatic failure            | Normal |
| Adult                                                                                                                                                                                                                                                                                                                                                                                                                                                                     | 40 | M | 48  | 1320 | Pulmonary embolism         | Normal |
| Adult                                                                                                                                                                                                                                                                                                                                                                                                                                                                     | 42 | M | 103 | 1560 | Suspension by ligature     | Normal |
| Adult                                                                                                                                                                                                                                                                                                                                                                                                                                                                     | 51 | M | 51  | 1460 | Coronary artery atheroma   | Normal |
| Adult                                                                                                                                                                                                                                                                                                                                                                                                                                                                     | 56 | M | 44  | 1500 | Ischaemic heart disease    | Normal |
| Adult                                                                                                                                                                                                                                                                                                                                                                                                                                                                     | 53 | M | 64  | 1520 | Depressive episode         | Normal |
| Adult                                                                                                                                                                                                                                                                                                                                                                                                                                                                     | 57 | F | 73  | 1320 | Sudden death               | Normal |
| Adult                                                                                                                                                                                                                                                                                                                                                                                                                                                                     | 59 | F | 50  | 1500 | Cardiomegaly               | Normal |
| Adult                                                                                                                                                                                                                                                                                                                                                                                                                                                                     | 60 | M | 52  | 1460 | Ischaemic heart disease    | Normal |
| Adult                                                                                                                                                                                                                                                                                                                                                                                                                                                                     | 66 | M | 48  | 1350 | Hypertensive heart disease | Normal |
| Adult                                                                                                                                                                                                                                                                                                                                                                                                                                                                     | 71 | F | 41  | 1210 | Ischaemic heart disease    | Normal |
| Adult                                                                                                                                                                                                                                                                                                                                                                                                                                                                     | 74 | F | 41  | 1520 | Pulmonary embolism         | Normal |
| Adult                                                                                                                                                                                                                                                                                                                                                                                                                                                                     | 74 | M | 23  | 1350 | Ischaemic heart disease    | Normal |
| Adult                                                                                                                                                                                                                                                                                                                                                                                                                                                                     | 74 | M | 12  | 1600 | Pulmonary embolism         | Normal |
| Adult                                                                                                                                                                                                                                                                                                                                                                                                                                                                     | 75 | F | 24  | 1580 | Ischaemic heart disease    | Normal |
| Total number of cases shown is n = 45, total cases assessed is 71 (Excluded cases due to trauma, malformation, hypoxic injury to the area or loss of antigenicity). <i>BW</i> : brain weight; <i>F</i> : female; <i>M</i> : male; <i>n/k</i> : not known; <i>PMI</i> : post-mortem interval; <i>SUDEP</i> : sudden unexpected death in epilepsy; <i>SUDI</i> : sudden unexpected death in infancy; * <i>Age range in days for cases &lt; 1 year</i> : (1 day - 335 days). |    |   |     |      |                            |        |
